# Supplementary material for: Rod phototransduction and light signal transmission during type 2 diabetes
Source: PubMed Central journal article supplement — BMJ Open Diabetes Res Care. 2020 Aug 11;8(1):e001571. doi: 10.1136/bmjdrc-2020-001571 (PMC7418690; doi:10.1136/bmjdrc-2020-001571), 2020-08-11
Supplement: bmjdrc-2020-001571supp001.pdf [file bmjdrc-2020-001571supp001.pdf]

**A** 3 months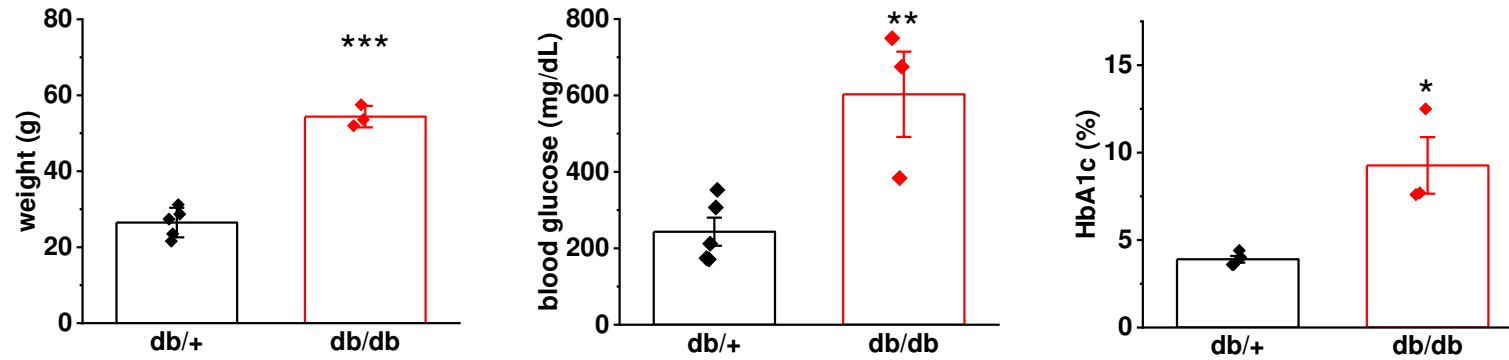**B** 6 months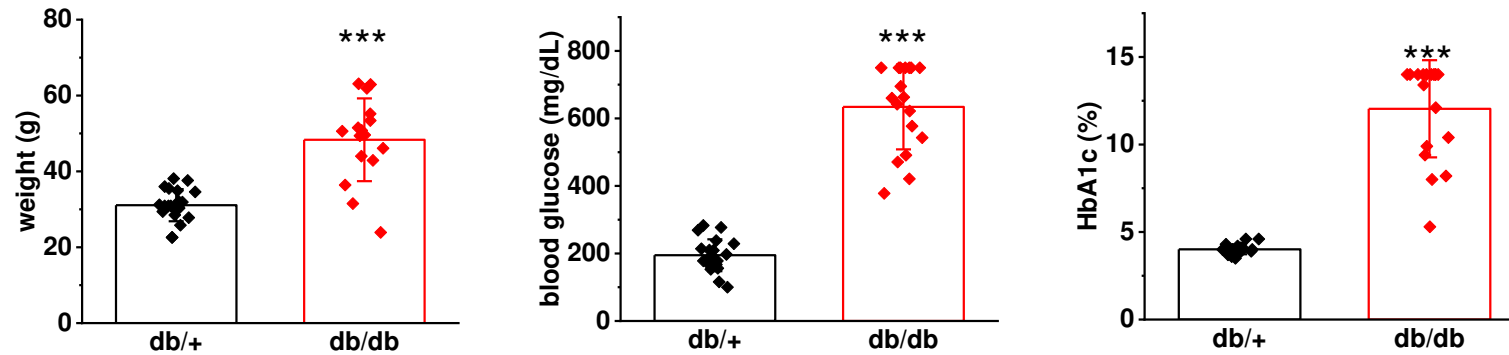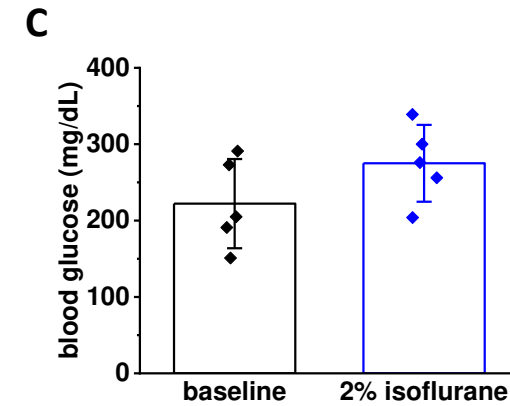

**Supplementary Figure 1: Weight, blood glucose and HbA1c are increased in diabetic mice.** Body weight, blood glucose and HbA1c in db/db mice compared to db/+ mice at 3 months (A, n=3-5, \* p<0.05, \*\* p<0.01, \*\*\* p<0.001) and 6 months of age (B, n=16-21, \*\*\*p<0.001). Blood glucose in C57BL/6J mice before and during 2% isoflurane inhalation (C, n=5).
