# Supplementary material for: Rod phototransduction and light signal transmission during type 2 diabetes
Source: PubMed Central journal article supplement — BMJ Open Diabetes Res Care. 2020 Aug 11;8(1):e001571. doi: 10.1136/bmjdrc-2020-001571 (PMC7418690; doi:10.1136/bmjdrc-2020-001571), 2020-08-11
Supplement: bmjdrc-2020-001571supp002.pdf [file bmjdrc-2020-001571supp002.pdf]

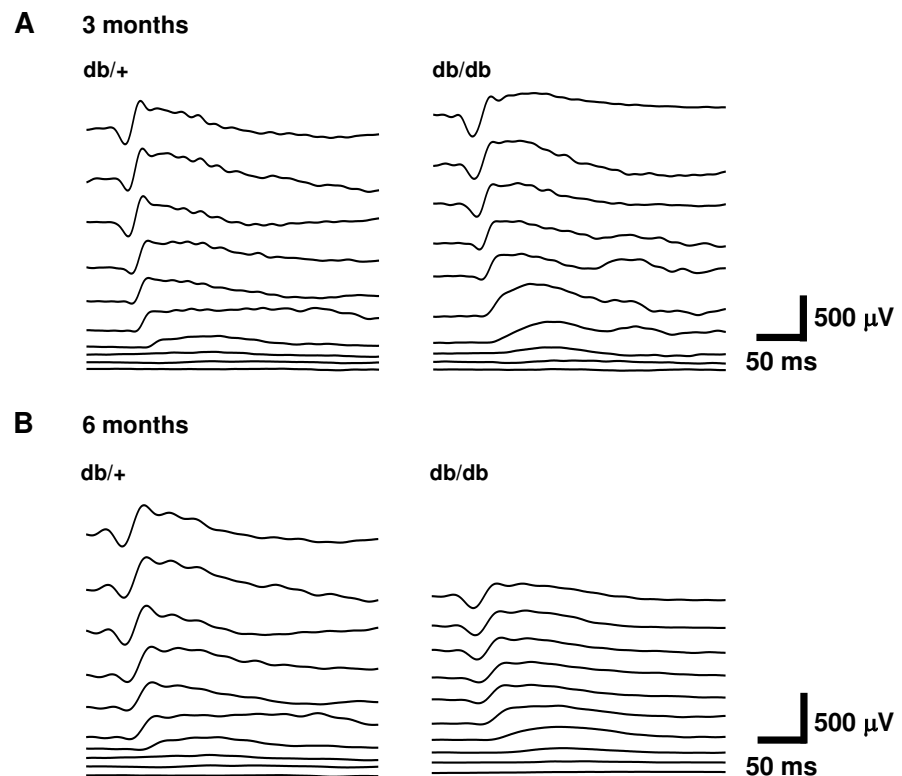

**Supplementary Figure 2: Scotopic a- and b-waves are reduced in 6 but not 3 months old type 2 diabetic mice *in vivo*.** Representative *in vivo* ERG light responses from 3 (A) and 6 (B) month old control (db/+) and diabetic (db/db) mice to flashes of light ranging from  $10^{-5}$  to  $30 \text{ cd s m}^{-2}$ .
